# Supplementary material for: Current Diagnosis and Management of Immune Related Adverse Events (irAEs) Induced by Immune Checkpoint Inhibitor Therapy
Source: PubMed Central journal article supplement (PMC5296331; doi:10.3389/fphar.2017.00049), 2017-02-08
Supplement: Table1.pdf [file Table1.pdf]

**Table S1. Immune related adverse events (irAEs) in select clinical trials.**

| Clinical Trials                                                    | Details                                      | Number of patients, type of Immune Checkpoint Inhibitor and dose.                                                                                             | Adverse events       |            |            |
|--------------------------------------------------------------------|----------------------------------------------|---------------------------------------------------------------------------------------------------------------------------------------------------------------|----------------------|------------|------------|
|                                                                    |                                              |                                                                                                                                                               | Organ system / event | All grade  | Grade ≥ 3  |
| <b>Anti- cytotoxic T-lymphocyte –associated protein 4 (CTLA 4)</b> |                                              |                                                                                                                                                               |                      |            |            |
| <b>Eggermont et al.<sup>19</sup></b><br>2016<br>Ipilimumab         | Phase 3 stage III melanoma                   | 471 patients on ipilimumab at dose of 10ml/kg every 3 weeks for 4 doses then every 3 monthly for up to 3 years (reported after median follow up of 5.3 years) | Any irAEs            | 426 (90.4) | 201 (42.7) |
|                                                                    |                                              |                                                                                                                                                               | Dermatological       | 298(63.3)  | 20(4.2)    |
|                                                                    |                                              |                                                                                                                                                               | Rash                 | 161(34.2)  | 5(1.1)     |
|                                                                    |                                              |                                                                                                                                                               | Gastrointestinal     | 217(46)    | 70(16.1)   |
|                                                                    |                                              |                                                                                                                                                               | Diarrhea             | 194(41)    | 46(9.8)    |
|                                                                    |                                              |                                                                                                                                                               | Colitis              | 73(15.5)   | 39(8.2)    |
|                                                                    |                                              |                                                                                                                                                               | Endocrine            | 178(37.8)  | 37(7.9)    |
|                                                                    |                                              |                                                                                                                                                               | Hypophysitis         | 77(16.3)   | 21(4.4)    |
|                                                                    |                                              |                                                                                                                                                               | Hepatic              | 115(24.2)  | 51(10.8)   |
|                                                                    |                                              |                                                                                                                                                               | ↑ Liver enzymes      | 83(17.6)   | 20(4.3)    |
| Neurologic                                                         | 21(4.5)                                      | 9(1.9)                                                                                                                                                        |                      |            |            |
| <b>Eggermont et al.<sup>20</sup></b><br>2015<br>Ipilimumab         | Phase 3 Stage III melanoma                   | 471 patients on ipilimumab at dose of 10mg/kg every 3 weeks for 4 doses then every 3 monthly for up to 3 years (reported after median follow up of 2.7 years) | Any irAEs            | 226(48)    | 200(43)    |
|                                                                    |                                              |                                                                                                                                                               | Dermatologic         | 277(59)    | 21(4)      |
|                                                                    |                                              |                                                                                                                                                               | Pruritus             | 176(37)    | 2(11)      |
|                                                                    |                                              |                                                                                                                                                               | Rash                 | 156(33)    | 6(17)      |
|                                                                    |                                              |                                                                                                                                                               | Gastrointestinal     | 142(30)    | 75(16)     |
|                                                                    |                                              |                                                                                                                                                               | Diarrhea             | 150(32)    | 45(10)     |
|                                                                    |                                              |                                                                                                                                                               | Colitis              | 39(8)      | 36(8)      |
|                                                                    |                                              |                                                                                                                                                               | Endocrine            | 137(29)    | 40(9)      |
|                                                                    |                                              |                                                                                                                                                               | Hypophysitis         | 62(13)     | 24(6)      |
|                                                                    |                                              |                                                                                                                                                               | Hypothyroidism       | 41(9)      | 1(<1)      |
| Hepatic                                                            | 68(14)                                       | 50(11)                                                                                                                                                        |                      |            |            |
| ↑ Liver enzymes                                                    | 68(14)                                       | 25(5)                                                                                                                                                         |                      |            |            |
| Neurologic                                                         | 12(3)                                        | 9(2)                                                                                                                                                          |                      |            |            |
| <b>Hodi et al.<sup>1</sup></b><br>2010<br>Ipilimumab               | Phase 3 Unresectable stage III / IV melanoma | 137 patients on ipilimumab alone at dose of 3mg/kg every 3 weeks up to 4 doses.                                                                               | Any irAEs            | 80(61.1)   | 19(14.5)   |
|                                                                    |                                              |                                                                                                                                                               | Dermatologic         | 57(43.5)   | 2(1.5)     |
|                                                                    |                                              |                                                                                                                                                               | Pruritus             | 32(2.4)    | 0 (0)      |
|                                                                    |                                              |                                                                                                                                                               | Rash                 | 25(19.1)   | 1(<1)      |
|                                                                    |                                              |                                                                                                                                                               | Gastrointestinal     | 38(29)     | 10(7.6)    |
|                                                                    |                                              |                                                                                                                                                               | Diarrhea             | 36(27.5)   | 6(4.6)     |
|                                                                    |                                              |                                                                                                                                                               | Colitis              | 10(7.6)    | 7(5.3)     |
|                                                                    |                                              |                                                                                                                                                               | Endocrine            | 10(7.6)    | 5(3.8)     |
|                                                                    |                                              |                                                                                                                                                               | Hypothyroidism       | 2(1.5)     | 0 (0)      |
|                                                                    |                                              |                                                                                                                                                               | Hypophysitis         | 3(2.3)     | 2(1.6)     |
| Adrenal insufficiency                                              | 2(1.5)                                       | 2(1.5)                                                                                                                                                        |                      |            |            |
| Hepatic                                                            | 5(3.8)                                       | 0 (0)                                                                                                                                                         |                      |            |            |

|                                                          |                                                                                      |                                                                                                                         |                                                                                                                                                                                                                                   |                                                                                                                                          |                                                                                                                             |
|----------------------------------------------------------|--------------------------------------------------------------------------------------|-------------------------------------------------------------------------------------------------------------------------|-----------------------------------------------------------------------------------------------------------------------------------------------------------------------------------------------------------------------------------|------------------------------------------------------------------------------------------------------------------------------------------|-----------------------------------------------------------------------------------------------------------------------------|
|                                                          |                                                                                      |                                                                                                                         | ↑ ALT<br>↑ AST<br>Hepatitis                                                                                                                                                                                                       | 2(1.5)<br>1(<1)<br>1(<1)                                                                                                                 | 0 (0)<br>0 (0)<br>0 (0)                                                                                                     |
| <b>Wolchok et al.</b> <sup>9</sup><br>2010<br>Ipilimumab | Phase 2<br>Previously<br>treated stage<br>III / IV<br>melanoma                       | 71 patients on ipilimumab at<br>dose of 10mg/kg every 3 weeks<br>for 4 doses followed by<br>maintenance every 3 months. | Any irAEs<br>Dermatological<br>Gastrointestinal<br>Endocrine<br>Hepatic                                                                                                                                                           | 50 (68)<br>33(45)<br>28(38)<br>3(4)<br>2(3)                                                                                              | 18(25)<br>3(4)<br>11(15)<br>1(1)<br>2(3)                                                                                    |
|                                                          |                                                                                      | 71 patients on ipilimumab at<br>dose of 3 mg/kg every 3weeks<br>for 4 doses followed by<br>maintenance every 3 months   | Any irAEs<br>Dermatological<br>Gastrointestinal<br>Endocrine<br>Hepatic                                                                                                                                                           | 46(64)<br>32(44)<br>23(32)<br>4(6)<br>0 (0)                                                                                              | 5(7)<br>1(1)<br>2(3)<br>2(3)<br>0 (0)                                                                                       |
|                                                          |                                                                                      | 71 patients on ipilimumab at<br>dose of 0.3 mg/kg every<br>3weeks for 4 doses followed by<br>maintenance every 3 months | Any irAEs<br>Dermatological<br>Gastrointestinal<br>Endocrine<br>Hepatic                                                                                                                                                           | 19(26)<br>09(13)<br>12(17)<br>0 (0)<br>0 (0)                                                                                             | 0 (0)<br>0 (0)<br>0 (0)<br>0 (0)<br>0 (0)                                                                                   |
| <b>Postow et al.</b> <sup>8</sup><br>2015<br>Ipilimumab  | Phase 2<br>Unresectable,<br>previously<br>untreated,<br>stage III and<br>IV melanoma | 46 patients on ipilimumab at<br>dose of 3 mg/kg.                                                                        | Dermatological<br>Gastrointestinal<br>Diarrhea<br>Colitis<br>Endocrine<br>Hypothyroidism<br>Hypophysitis<br>Adrenal<br>insufficiency<br>Hepatic<br>↑ ALT<br>↑ AST<br>↑ Lipase<br>Pneumonitis<br>Discontinuation<br>of the therapy | 27 (58)<br>17 (37)<br>17(37)<br>6 (13)<br>8 (17)<br>7 (15)<br>3 (7)<br>2 (4)<br>2 (4)<br>2 (4)<br>2(4)<br>2(4)<br>2(4)<br>2 (4)<br>8(17) | 0 (0)<br>5 (11)<br>5(11)<br>3 (7)<br>2 (4)<br>0 (0)<br>2 (4)<br>1 (2)<br>0 (0)<br>0 (0)<br>0 (0)<br>0 (0)<br>1 (2)<br>6(13) |
| <b>Larkin et al.</b> <sup>6</sup><br>2015<br>Ipilimumab  | Phase 3<br>Stage III or IV<br>melanoma                                               | 311 patients on ipilimumab<br>alone at dose of<br>mg/kg every weeks                                                     | Any IrAEs<br>Dermatological<br>Pruritus<br>Rash<br>Vitiligo<br>Gastrointestinal<br>Diarrhea<br>Colitis<br>Endocrine                                                                                                               | 229 (73.6)<br>168 (54)<br>110 (35.4)<br>65 (20.9)<br>12 (3.9)<br>114 (36.7)<br>103 (33.1)<br>36 (11.6)<br>34 (10.9)                      | 58 (18.6)<br>9 (2.9)<br>1 (0.3)<br>5 (1.6)<br>0 (0)<br>36 (11.6)<br>19 (6.1)<br>27 (8.7)<br>7 (2.3)                         |

|                                                                    |                                                            |                                                                                                                  |                               |           |         |
|--------------------------------------------------------------------|------------------------------------------------------------|------------------------------------------------------------------------------------------------------------------|-------------------------------|-----------|---------|
|                                                                    |                                                            |                                                                                                                  | Hypothyroidism                | 27 (8.6)  | 0 (0)   |
|                                                                    |                                                            |                                                                                                                  | Hyperthyroidism               | 13 (4.2)  | 0 (0)   |
|                                                                    |                                                            |                                                                                                                  | Hypophysitis                  | 12 (3.9)  | 6 (1.9) |
|                                                                    |                                                            |                                                                                                                  | Hepatic                       | 22 (7.1)  | 5 (1.6) |
|                                                                    |                                                            |                                                                                                                  | ↑ ALT                         | 12(3.9)   | 5(1.6)  |
|                                                                    |                                                            |                                                                                                                  | ↑ AST                         | 11(3.5)   | 2 (0.6) |
|                                                                    |                                                            |                                                                                                                  | Pulmonary                     | 6 (1.9)   | 1 (0.3) |
|                                                                    |                                                            |                                                                                                                  | Pneumonitis                   | 5 (1.6)   | 1 (0.3) |
| <b>Ribas et al.<sup>3</sup></b><br>2013<br>Tremelimumab            | Phase 3<br>Stage IIIc/ IV<br>melanoma                      | 325 patients on tremelimumab<br>at dose of 15mg/kg every 90<br>days                                              | Endocrine                     | 24 (7)    | NR      |
|                                                                    |                                                            |                                                                                                                  | Thyroid                       | 17 (5)    | 2(1)    |
|                                                                    |                                                            |                                                                                                                  | Hypothalamus<br>and pituitary | 6 (2)     | 4(1)    |
|                                                                    |                                                            |                                                                                                                  | Adrenal<br>insufficiency      | 4(1)      | 3(1)    |
|                                                                    |                                                            |                                                                                                                  | Pancreatitis                  | 3(1)      | 3(1)    |
|                                                                    |                                                            |                                                                                                                  | Hepatitis                     | 2(1)      | 2(1)    |
| <b>Anti- programmed cell death protein-1/-Ligand1 (PD-1/PD-L1)</b> |                                                            |                                                                                                                  |                               |           |         |
| <b>Borghaei et al.<sup>44</sup></b><br>2015<br>Nivolumab           | Phase 3<br>IIIb/IV or<br>recurrent<br>nonsquamous<br>NSCLC | 292 patients on nivolumab at<br>dose of 3mg/kg every 2 weeks.                                                    | Rash                          | 27(9)     | 1(<1)   |
|                                                                    |                                                            |                                                                                                                  | Pruritus                      | 24(8)     | 0 (0)   |
|                                                                    |                                                            |                                                                                                                  | Diarrhea                      | 22(8)     | 2(1)    |
|                                                                    |                                                            |                                                                                                                  | Colitis                       | 2(1)      | 1(<1)   |
|                                                                    |                                                            |                                                                                                                  | Hypothyroidism                | 19(7)     | 0 (0)   |
|                                                                    |                                                            |                                                                                                                  | Hyperthyroidism               | 4(1)      | 0 (0)   |
|                                                                    |                                                            |                                                                                                                  | ↑ ALT                         | 9(3)      | 0 (0)   |
|                                                                    |                                                            |                                                                                                                  | ↑ AST                         | 9(3)      | 1(<1)   |
|                                                                    |                                                            |                                                                                                                  | Pneumonitis                   | 8(3)      | 3(1)    |
|                                                                    |                                                            |                                                                                                                  | ILD                           | 2(1)      | 1(<1)   |
|                                                                    |                                                            |                                                                                                                  | ↑ Creatinine                  | 5(2)      | 0 (0)   |
|                                                                    |                                                            |                                                                                                                  | Renal Failure                 | 1(<1)     | 0 (0)   |
| <b>Topalian et al.<sup>10</sup></b><br>2014<br>Nivolumab           | Phase 1<br>Advanced<br>melanoma                            | 107 patients on nivolumab at<br>dose of 1mg/kg or 3mg/kg or<br>10mg/kg once every 2 weeks<br>for up to 96 weeks. | Any irAEs                     | 58 (54.2) | 5 (4.7) |
|                                                                    |                                                            |                                                                                                                  | Dermatological                | 38 (35.5) | 0 (0)   |
|                                                                    |                                                            |                                                                                                                  | Rash                          | 25(23.4)  | 0 (0)   |
|                                                                    |                                                            |                                                                                                                  | Pruritus                      | 14(3.1)   | 0 (0)   |
|                                                                    |                                                            |                                                                                                                  | Gastrointestinal              | 19 (17.8) | 2 (1.9) |
|                                                                    |                                                            |                                                                                                                  | Diarrhea                      | 19 (17.8) | 2 (1.9) |
|                                                                    |                                                            |                                                                                                                  | Colitis                       | 2(2)      | 1 (0.9) |
|                                                                    |                                                            |                                                                                                                  | Hypothyroidism                | 6(5.6)    | 1 (0.9) |
|                                                                    |                                                            |                                                                                                                  | Hyperthyroidism               | 2(1.9)    | 0 (0)   |
|                                                                    |                                                            |                                                                                                                  | Hepatic                       | 7(6.5)    | 1 (0.9) |
|                                                                    |                                                            |                                                                                                                  | ↑ ALT                         | 5(4.7)    | 0 (0)   |
|                                                                    |                                                            |                                                                                                                  | ↑ AST                         | 4(3.7)    | 0 (0)   |
|                                                                    |                                                            |                                                                                                                  | Pneumonitis                   | 2(2)      | 0 (0)   |
|                                                                    |                                                            |                                                                                                                  | Renal Failure                 | 2(2)      | 0 (0)   |

|                                                        |                                                                           |                                                              |                                                                                                                                                                                                                                   |                                                                                                                                                                                                     |                                                                                                                                                                                |
|--------------------------------------------------------|---------------------------------------------------------------------------|--------------------------------------------------------------|-----------------------------------------------------------------------------------------------------------------------------------------------------------------------------------------------------------------------------------|-----------------------------------------------------------------------------------------------------------------------------------------------------------------------------------------------------|--------------------------------------------------------------------------------------------------------------------------------------------------------------------------------|
|                                                        |                                                                           |                                                              | Infusion Reactions                                                                                                                                                                                                                | 6(5.6)                                                                                                                                                                                              | 0 (0)                                                                                                                                                                          |
| <b>Rizvi et al.</b> <sup>46</sup><br>2015<br>Nivolumab | Phase2<br>squamous<br>NSCLC                                               | 117 patients on nivolumab at<br>dose of 3mg/kg every 2 weeks | Dermatological<br>Rash<br>Diarrhea<br>Endocrine<br>Hypothyroidism<br>Hyperthyroidism<br>Pneumonitis<br>Renal Failure<br>↑ ALT                                                                                                     | 18(15)<br>13(11)<br>12(10)<br>7(6)<br>3(3)<br>1(1)<br>6(5)<br>1(1)<br>1(1)                                                                                                                          | 2(2)<br>1(1)<br>3(3)<br>1(1)<br>0 (0)<br>0 (0)<br>4(3)<br>0 (0)<br>0 (0)                                                                                                       |
| <b>Larkin et al.</b> <sup>6</sup><br>2015<br>Nivolumab | Phase 3<br>Stage III or IV<br>melanoma                                    | 313 patients on nivolumab at<br>dose of 3mg/kg every 2 weeks | Any irAEs<br>Dermatological<br>Pruritus<br>Rash<br>Vitiligo<br>Gastrointestinal<br>Diarrhea<br>Colitis<br>Endocrine<br>Hypothyroidism<br>Hyperthyroidism<br>Hypophysitis<br>Hepatic<br>↑ ALT<br>↑ AST<br>Pulmonary<br>Pneumonitis | 194 (62)<br>131 (41.9)<br>59(18.8)<br>81(25.9)<br>23 (7.3)<br>61 (19.5)<br>60 (19.2)<br>4 (1.3)<br>45 (14.4)<br>27(8.6)<br>4(1.3)<br>2(0.6)<br>20 (6.4)<br>12(3.8)<br>12(3.8)<br>5 (1.6)<br>4 (1.3) | 24 (7.7)<br>5 (1.6)<br>0 (0)<br>2(0.6)<br>1 (0.3)<br>7 (2.2)<br>7(2.2)<br>2 (0.6)<br>2 (0.6)<br>0 (0)<br>2 (0.6)<br>1 (0.3)<br>8 (2.6)<br>4(1.3)<br>3(1)<br>1 (1.3)<br>1 (0.3) |
| <b>Robert et al.</b> <sup>5</sup><br>2016<br>Nivolumab | Phase 3<br>recurrent<br>squamous cell<br>carcinoma of<br>head and<br>neck | 240 patients on nivolumab at<br>dose of 3mg/kg every 2 weeks | Dermatological<br>Rash<br>pruritus<br>Gastrointestinal<br>Diarrhea<br>Endocrine<br>Hypothyroidism<br>Hyperthyroidism<br>Hepatic<br>↑ ALT<br>↑ AST<br>Pneumonitis<br>Renal Failure                                                 | 37(15.7)<br>18(7.6)<br>17(7.2)<br>16(6.8)<br>16(6.8)<br>18 (7.6)<br>9(3.8)<br>2 (0.8)<br>5 (2.1)<br>2 (0.8)<br>2 (0.8)<br>5(2.1)<br>1(0.4)                                                          | 0(0)<br>0(0)<br>0(0)<br>0(0)<br>1(<1)<br>0(0)<br>0(0)<br>2 (0.8)<br>1 (0.4)<br>1 (0.4)<br>2(0.8)<br>0(0)                                                                       |
| <b>Martin et al.</b> <sup>11</sup><br>2016             | Stage IV<br>NSCLC                                                         | 154 patients on<br>pembrolizumab at dose of                  | Any irAEs<br>Sever skin rash                                                                                                                                                                                                      | 45(29.2)<br>6(3.9)                                                                                                                                                                                  | 15(9.7)<br>6(3.9)                                                                                                                                                              |

|                                                              |                                                                                                 |                                                                                                                  |                                                                                                                                                                  |                                                                                                              |                                                                                                       |
|--------------------------------------------------------------|-------------------------------------------------------------------------------------------------|------------------------------------------------------------------------------------------------------------------|------------------------------------------------------------------------------------------------------------------------------------------------------------------|--------------------------------------------------------------------------------------------------------------|-------------------------------------------------------------------------------------------------------|
| Pembrolizumab                                                |                                                                                                 | 200mg every 3 weeks                                                                                              | Colitis<br>Hypothyroidism<br>Hyperthyroidism<br>Thyroiditis<br>Hypophysitis<br>Myositis<br>Nephritis<br>Pneumonitis<br>Infusion reaction<br>Pancreatitis<br>T1DM | 3(1.9)<br>14(9.1)<br>12(7.8)<br>4(2.6)<br>1(6.6)<br>3(1.9)<br>1(0.6)<br>9(5.8)<br>7(4.5)<br>1(0.6)<br>1(0.6) | 2(1.3)<br>0 (0)<br>0 (0)<br>0 (0)<br>1(6.6)<br>0 (0)<br>1(0.6)<br>4(2.6)<br>0 (0)<br>1(0.6)<br>1(0.6) |
| <b>Seiwert et al.</b> <sup>47</sup><br>2016<br>Pembrolizumab | Phase 1b<br>Recurrent or<br>metastatic<br>squamous cell<br>carcinoma of<br>the head and<br>neck | 60 patients on pembrolizumab<br>at dose of<br>10mg/kg every 2 weeks                                              | Any irAEs<br>Hypothyroidism<br>Adrenal<br>insufficiency<br>Hyperthyroidism<br>Rash<br>Grade 2 myositis                                                           | 9 (15)<br>4 (7)<br>2 (3)<br>1 (1.5)<br>1 (1.5)<br>1 (1.5)                                                    | 0 (0)<br>0 (0)<br>0 (0)<br>0 (0)<br>0 (0)<br>0 (0)                                                    |
| <b>Herbst et al.</b> <sup>18</sup><br>2016<br>Pembrolizumab  | Phase 2/3<br>Advanced<br>NSCLC                                                                  | 345 patients on<br>pembrolizumab at dose of<br>2mg/kg                                                            | Severe skin<br>reactions<br>Colitis<br>Hypothyroidism<br>Hyperthyroidism<br>Hypophysitis<br>Hepatitis<br>Pancreatitis<br>Pneumonitis                             | 4 (1)<br>4 (1)<br>28(8)<br>12 (4)<br>1(<1)<br>1(<1)<br>3 (1)<br>16(5)                                        | 3(1)<br>3 (1)<br>0 (0)<br>0 (0)<br>1(<1)<br>1(<1)<br>2 (1)<br>7(2)                                    |
|                                                              |                                                                                                 | 346 patients on<br>pembrolizumab at dose of 10<br>mg/kg every 2 weeks                                            | Severe skin<br>reactions<br>Colitis<br>Hypothyroidism<br>Hyperthyroidism<br>Hypophysitis<br>Hepatitis<br>Pneumonitis                                             | 7 (2)<br>4 (1)<br>28(8)<br>20 (6)<br>2 (1)<br>2(1)<br>15(4)                                                  | 6 (2)<br>3 (1)<br>0 (0)<br>1 (<1)<br>1 (<1)<br>0 (0)<br>0(0)                                          |
| <b>Garon et al.</b> <sup>48</sup><br>2015<br>Pembrolizumab   | Phase 1<br>Advanced or<br>metastatic<br>NSCLC                                                   | 495 patients on<br>pembrolizumab at dose of 2<br>mg/kg or 10 mg/kg every 3<br>weeks or 10 mg/kg every 2<br>weeks | Pruritus<br>Rash<br>Dry skin<br>Diarrhea<br>Hypothyroidism<br>↑ ALT<br>↑ AST<br>Pneumonitis                                                                      | 53(10.7)<br>48(9.7)<br>18(3.6)<br>40 (8.1)<br>34 (3.6)<br>15(6.9)<br>11(3)<br>18(3.6)                        | 0 (0)<br>1(0.2)<br>0(0)<br>3 (0.6)<br>1 (0.2)<br>9(1.8)<br>3(0.6)<br>9(1.8)                           |

|                                                                 |                                                                            |                                                                                 |                                                                          |                                                 |                                             |
|-----------------------------------------------------------------|----------------------------------------------------------------------------|---------------------------------------------------------------------------------|--------------------------------------------------------------------------|-------------------------------------------------|---------------------------------------------|
| <b>Rosenberg et al.<sup>50</sup></b><br>2016<br>Atezolizumab    | Phase 2<br>Locally advanced or metastatic urothelial carcinoma             | 310 patients on atezolizumab at dose of 1200mg every 3 weeks                    | Any irAEs<br>Rash<br>↑ALT<br>↑AST<br>Pneumonitis                         | 23(7)<br>2(1)<br>2(1)<br>2(1)<br>2(1)           | 15(5)<br>1(<1)<br>1(<1)<br>1(<1)<br>2(1)    |
| <b>Fehrenbacher et al.<sup>13</sup></b><br>2016<br>Atezolizumab | Phase 2<br>Advanced or metastatic NSCLC                                    | 142 patients on atezolizumab at dose of 1200 mg every 3 weeks                   | Colitis<br>↑ALT<br>↑AST<br>Hepatitis<br>Pneumonitis                      | 2 (1)<br>6 (4)<br>6 (4)<br>1 (<1)<br>4 (3)      | 1 (<1)<br>3 (2)<br>3 (2)<br>0 (0)<br>1 (<1) |
| <b>Rittmeyer et al.<sup>14</sup></b><br>2016<br>Atezolizumab    | Phase 3<br>Stage IIIB/ IV NSCLC                                            | Safety analysis reported for 609 patients on atezolizumab 1200 mg every 3 weeks | Colitis<br>Hepatitis<br>Pneumonitis                                      | 2 (<1)<br>2 (<1)<br>6 (1)                       | 0 (0)<br>2 (<1)<br>0 (0)                    |
| <b>Massard et al.<sup>12</sup></b><br>2016<br>Durvalumab        | Phase 1/2<br>Inoperable/ metastatic transitional-cell urothelial carcinoma | 61 patients on Durvalumab at dose of 10mg/kg every 2 weeks up to 12 months.     | Any irAEs <sup>§</sup><br>Pruritus<br>Diarrhea<br>Colitis<br>Pneumonitis | 14 (23)<br>2 (3.3)<br>6 (9.8)<br>0 (0)<br>0 (0) | 3 (4.9)<br>0 (0)<br>0 (0)<br>0 (0)<br>0 (0) |

# The cumulative numbers for the specific events may be greater than the number reported for organ category because patients with more than one event were counted separately for each event but only once for organ category.

§ Not all immune related adverse events were captured due to limited follow up.

@NSCLC non –small cell lung cancer.
